# Supplementary material for: Kilo-scale droplet generation in three-dimensional monolithic elastomer device (3D MED)
Source: Royal Society of Chemistry journal article supplement (doi:10.1039/c5lc01025j), 2015-01-01
Supplement: c5lc01025j4.pdf [file c5lc01025j4.pdf]

# Kilo-Scale Droplet Generation in Three-Dimensional Monolithic Elastomer Device (3D MED)

Heon-Ho Jeong,<sup>a</sup> Venkata R. Yelleswarapu,<sup>b</sup> S Yadavali, David Issadore,<sup>b,c\*</sup> and Daeyeon Lee<sup>a,\*</sup>

<sup>a</sup>Department of Chemical and Biomolecular Engineering, University of Pennsylvania, Philadelphia, Pennsylvania 19104, USA

<sup>b</sup>Department of Bioengineering, University of Pennsylvania, Philadelphia, Pennsylvania 19104, USA

<sup>c</sup>Electrical and Systems Engineering, School of Engineering and Applied Sciences, University of Pennsylvania, Philadelphia, PA 19104, USA.

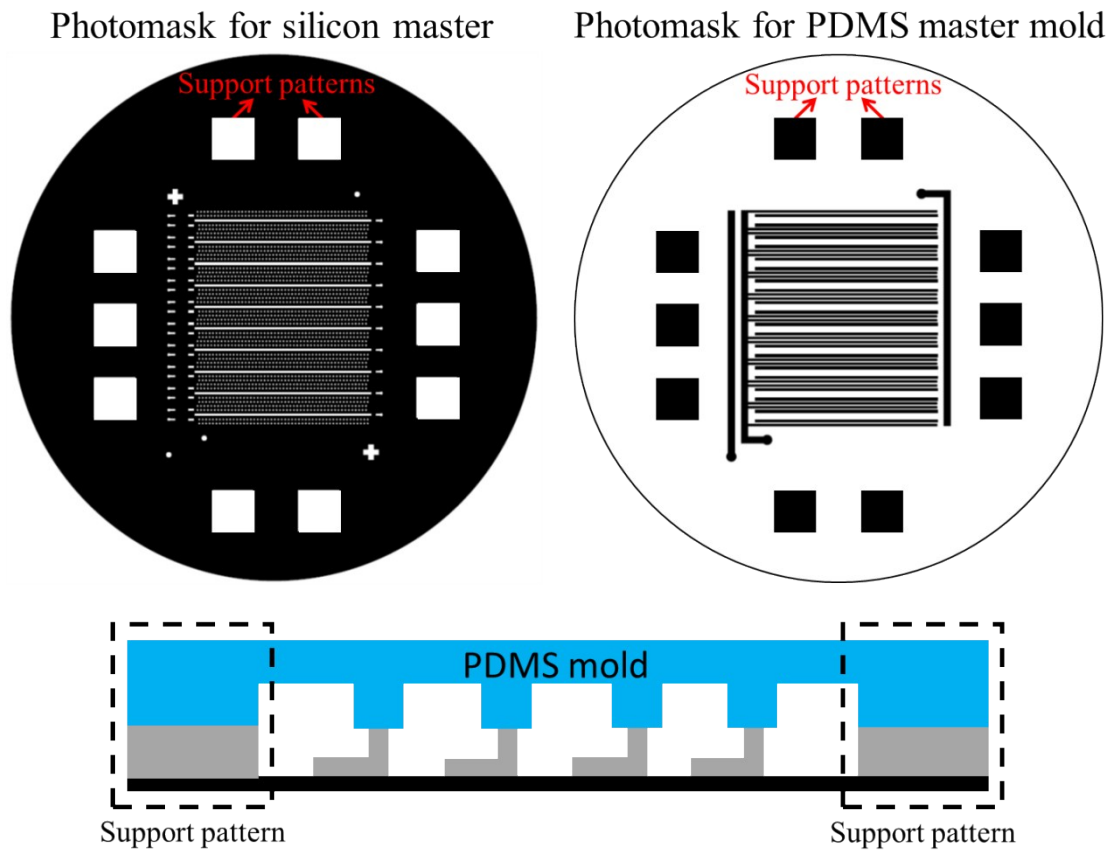

Fig. S1 Photomask with designed support pattern (upper two images) and schematic diagram (below) to maintain alignment between silicon master and PDMS mold.

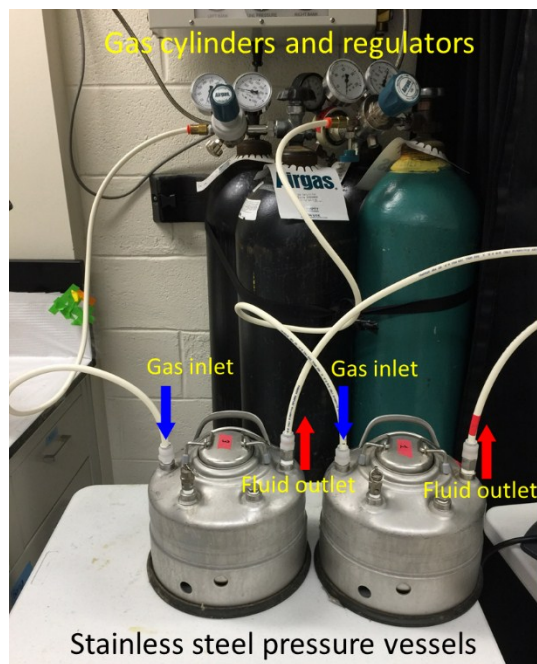

Fig. S2 Experimental set-up for pressure driven flow using stainless steel pressure vessels.

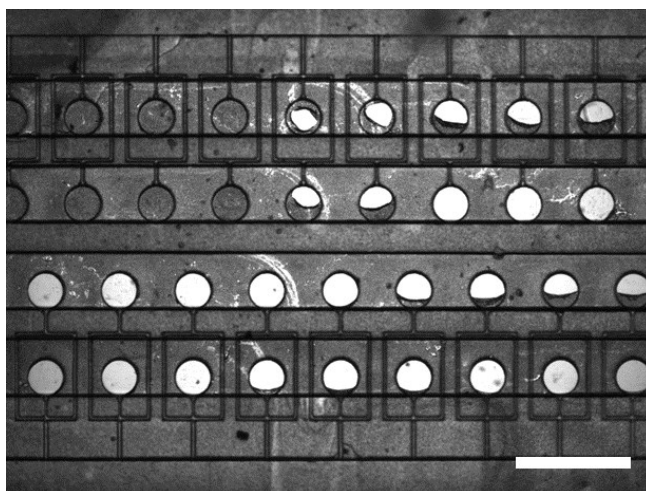

Fig. S3 Formation of thin film PDMS on through-holes with lower pressure application below 20 kPa. Scale bar indicates 1mm.

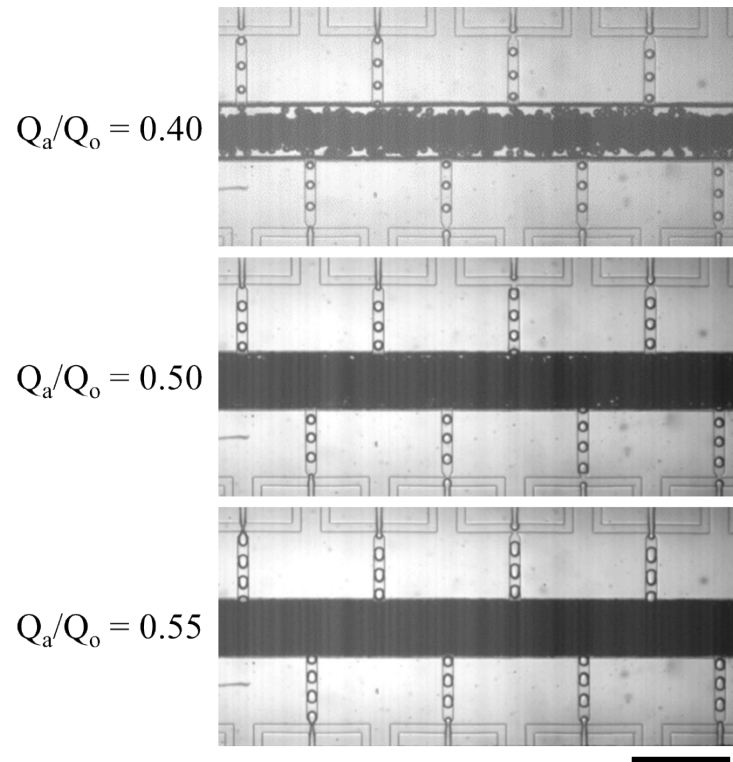

Fig. S4 Generation of the W/O emulsion in k-FFGs at different ratios of water/oil flow rates.  $Q_a$  and  $Q_o$  represent the flow rates of the water and oil phases, respectively. Scale bar indicates 0.5 mm.
